# Supplementary material
Source: PubMed Central journal article supplement (PMC7543862)
Supplement: tpmd190911.SD1.pdf [file tpmd190911.SD1.pdf]

## Supplemental Information

### Effect of a Community Led Total Sanitation (CLTS) intervention on sanitation and hygiene in Pallisa district, Uganda

#### Semi-structured questionnaire.

|                                                                          |                                                                                                                                                                          |
|--------------------------------------------------------------------------|--------------------------------------------------------------------------------------------------------------------------------------------------------------------------|
| Sub-County:                                                              | Parish:                                                                                                                                                                  |
| Village                                                                  |                                                                                                                                                                          |
| House hold ID NO                                                         | Date                                                                                                                                                                     |
| Interviewer name                                                         |                                                                                                                                                                          |
| <b>Section A: Socio-demographic (Tick the most appropriate response)</b> |                                                                                                                                                                          |
| 1                                                                        | Respondent I.D Number                                                                                                                                                    |
| 2                                                                        | What is the tribe of the respondent?<br><br>1. Mugwere<br>2. Ateso<br>3. Muganda<br>4. Mugisu<br>5. Musoga<br>6. Others specify-----                                     |
| 3                                                                        | For how long have you lived in this village?<br><br>1. Months to one year<br>2. 1 year to 2 years<br>3. 2 years to 3 years<br>4. More than 3 years.                      |
| 4                                                                        | How many members does this house hold have?<br><br>-----                                                                                                                 |
| 5                                                                        | What is the age of the respondent? (Completed years )<br>.....Years                                                                                                      |
| 6                                                                        | What is the gender of the respondent?<br><br>1. Male<br>2. Female                                                                                                        |
| 7                                                                        | What is the marital status of the respondent?<br><br>1. Single<br>2. Married<br>3. Separated<br>4. Widowed                                                               |
| 8                                                                        | What is the religion of the respondent?<br><br>1. Catholic<br>2. Protestant<br>3. Moslem<br>4. Seventh Day Adventist (SDA)<br>5. Born again<br>6. Others (Specify) ..... |
| 9                                                                        | What is the level of education of the respondent?<br><br>1. None<br>2. Primary<br>3. Secondary<br>4. Tertiary                                                            |
| 10                                                                       | What is the employment status of the respondent?<br><br>1. Employed<br>2. Not employed                                                                                   |

|    |                                                         |                                                                                                                                                                                                                    |
|----|---------------------------------------------------------|--------------------------------------------------------------------------------------------------------------------------------------------------------------------------------------------------------------------|
| 11 | If (1) above, what is the occupation of the respondent? | <ol style="list-style-type: none"> <li>1. Peasant/Farmer</li> <li>2. Salaried worker</li> <li>3. Business person</li> <li>4. Casual laborer</li> <li>5. Does nothing</li> <li>6. Others (specify) .....</li> </ol> |
| 12 | What is the average monthly income of the household?    | _____                                                                                                                                                                                                              |

**Section B: Knowledge about Hygiene and sanitation and hygiene for questions 13 to 18**

|    |                                                                                                                                                        |                                                                                                                                                                                                                                                              |
|----|--------------------------------------------------------------------------------------------------------------------------------------------------------|--------------------------------------------------------------------------------------------------------------------------------------------------------------------------------------------------------------------------------------------------------------|
| 13 | <p>What are the critical times for hand washing with soap?( tick all that apply)</p> <p><b>(do not read aloud)</b></p>                                 | <ol style="list-style-type: none"> <li>a) After visiting the latrine</li> <li>b) After handling a child's feces or cleaning a child's bottom</li> <li>c) Before feeding a child</li> <li>d) Before preparing food</li> <li>e) Before eating food.</li> </ol> |
| 14 | <p>What do you think can cause diarrhea in young children? (Tick all that apply).</p> <p>(Do not read the answers, keep probing for anything else)</p> | <ol style="list-style-type: none"> <li>a) Bad/dirty water</li> <li>b) Bad/dirty food</li> <li>c) Poor hygiene</li> <li>d) feces/defecating in the open</li> <li>e) Dirty hands</li> <li>f) Germs</li> <li>g) Flies</li> <li>I do not know</li> </ol>         |
| 15 | Do you think diarrhea can be prevented?                                                                                                                | <ol style="list-style-type: none"> <li>1. Yes</li> <li>2. No</li> <li>Don't know</li> </ol>                                                                                                                                                                  |
| 16 | <p>If yes, how do you think diarrhea can be prevented? ?( tick all that apply)</p> <p><b>(Do not read aloud encourage by probing for more)</b></p>     | <ol style="list-style-type: none"> <li>a) Wash hands</li> <li>b) Use soap</li> <li>c) Use pit latrine to defecate</li> <li>d) Dispose children's feces in pit latrine</li> <li>e) Bury feces</li> <li>f) I do not know</li> </ol>                            |
| 17 | Do you think it is important to have latrines and hand washing facilities?                                                                             | <ol style="list-style-type: none"> <li>1. Yes</li> <li>No</li> </ol>                                                                                                                                                                                         |
| 18 | <p>If yes why is important to have latrines and hand washing facilities? <b>(Do not read aloud encourage by probing for more).</b></p>                 | <ol style="list-style-type: none"> <li>a) Health</li> <li>b) Privacy</li> <li>c) To avoid shame</li> <li>d) For safe disposal of feces</li> <li>e) For proper hygiene</li> <li>f) To keep away flies</li> </ol>                                              |

|                                                   |                                                                                                           |                                                                                                                     |
|---------------------------------------------------|-----------------------------------------------------------------------------------------------------------|---------------------------------------------------------------------------------------------------------------------|
|                                                   |                                                                                                           | It is no good to defeacate in the open                                                                              |
| 19                                                | Have members of this households ever received health education about proper hygiene and sanitation.       | 1. Yes<br>2. No                                                                                                     |
| 20                                                | If yes to Q 19, who does the training on hygiene and sanitation? (Tick all that apply).                   | 1. Village health team members<br>2. Local council person<br>3. Team from district health office<br>4. Others ..... |
| 21                                                | How often is the training on proper hygiene and sanitation done?                                          | 1. Every month<br>2. Every 3 months<br>3. Every 6 months<br>4. Every year                                           |
| <b>Section C: prevalence of diarrheal disease</b> |                                                                                                           |                                                                                                                     |
| 22                                                | How many children are under five years in the household?                                                  | .....                                                                                                               |
| 23                                                | In the past 2 weeks, has there been any child below 5 years who experienced diarrhea?                     | 1 Yes<br>2 No                                                                                                       |
| 24                                                | How many of them have ever experienced diarrhea (3 or more loose stools in 24 hours) In the past 2 weeks? | -----                                                                                                               |

**Adapted from Plan International ODF Sustainability Study/ 2012 Annex III**

**Reference:**

Tyndale-Biscoe P, Bond M, Kidd R, 2013. Plan International ODF Sustainability Study. Available at: [http://www.communityledtotalsanitation.org/sites/communityledtotalsanitation.org/files/Plan\\_International\\_ODF\\_Sustainability\\_Study.pdf](http://www.communityledtotalsanitation.org/sites/communityledtotalsanitation.org/files/Plan_International_ODF_Sustainability_Study.pdf). Accessed.

### Observation checklist

|                                            |                                                                                                                                                                     |                                                                                    |
|--------------------------------------------|---------------------------------------------------------------------------------------------------------------------------------------------------------------------|------------------------------------------------------------------------------------|
|                                            | sub county                                                                                                                                                          |                                                                                    |
|                                            | Parish                                                                                                                                                              |                                                                                    |
|                                            | Village                                                                                                                                                             |                                                                                    |
|                                            | Observer name                                                                                                                                                       |                                                                                    |
|                                            | House hold ID                                                                                                                                                       |                                                                                    |
|                                            | Date                                                                                                                                                                |                                                                                    |
| <b>A. latrine status</b>                   |                                                                                                                                                                     |                                                                                    |
| <b>A i) Latrine availability and type.</b> |                                                                                                                                                                     |                                                                                    |
| 1                                          | Is there a latrine in the household or compound?                                                                                                                    | 1 Yes<br>2 No                                                                      |
| 2                                          | What is the type of latrine?                                                                                                                                        | 1 Pit<br>2 VIP<br>3 Pour Flush<br>4 Other If other, please specify type of latrine |
| <b>A ii) Latrine use</b>                   |                                                                                                                                                                     |                                                                                    |
| 3                                          | Is there evidence that the latrine is being used?<br>(Look for fresh feaces in pit, recent flushing for pour flush latrines, and worn track to latrine from house). | 1 Yes<br>2 No                                                                      |
| <b>A iii) Latrine quality</b>              |                                                                                                                                                                     |                                                                                    |
| 4                                          | Does the latrine have a door?                                                                                                                                       | 1 yes<br>2 No                                                                      |
| 5                                          | What is the latrine door constructed of?<br>(See notes for material description).                                                                                   | 1 Wood<br>2 iron sheets<br>3 Plastic<br>4 Cloth/Sacking.<br>5) No door             |
| 6                                          | Does the latrine have screen walls?                                                                                                                                 | 1) Yes<br>2) No                                                                    |
| 7                                          | What is the latrine walls constructed of?<br>( See notes for material description)                                                                                  | 1 Wood<br>2 Masonry<br>3 Plastic<br>4 Thatch<br>5 Cloth/Sack<br>6 No wall.         |
| 8                                          | Does the latrine have a roof?                                                                                                                                       | 1.Yes<br>2. No                                                                     |

|                                                           |                                                                                  |                                                                                                                                                                                                                                                                                                                                                                                                                                                                                                                                                                                                                                                                                                                                                                                                                                                   |
|-----------------------------------------------------------|----------------------------------------------------------------------------------|---------------------------------------------------------------------------------------------------------------------------------------------------------------------------------------------------------------------------------------------------------------------------------------------------------------------------------------------------------------------------------------------------------------------------------------------------------------------------------------------------------------------------------------------------------------------------------------------------------------------------------------------------------------------------------------------------------------------------------------------------------------------------------------------------------------------------------------------------|
| 9                                                         | What is the latrine roof constructed of?<br>(see notes for material description) | 1.Thatch<br>2.Iron sheets<br>3.Plastic<br>4.No roof                                                                                                                                                                                                                                                                                                                                                                                                                                                                                                                                                                                                                                                                                                                                                                                               |
| 10                                                        | What is the floor (slab) constructed of?                                         | 1.Wood<br>2. Masonry<br>3.Earth<br>4.metal<br>5.Other specify                                                                                                                                                                                                                                                                                                                                                                                                                                                                                                                                                                                                                                                                                                                                                                                     |
| 11                                                        | <b>Latrine quality</b>                                                           | <p><b>1. Good quality.</b> The latrine components (roof, walls and floor) are made of permanent materials, the floor is washable, has complete latrine structure, the pit is lined with permanent materials and has door to provide privacy for the user.</p> <p><b>2. Fair quality.</b> The latrine components (roof, walls and floor) are made of semi-permanent materials, the floor is not washable, has complete latrine structure, the pit may or may not be lined with permanent materials and has door/ temporary shutter to provide privacy for the user.</p> <p><b>3. Poor quality.</b> The latrine components (roof, walls and floor) are made of temporary materials, the floor is not washable (is made of mud), has no super structure, the pit is not lined and lacks door/ temporary shutter to provide privacy for the user.</p> |
| <b>B Squat hole covers.</b>                               |                                                                                  |                                                                                                                                                                                                                                                                                                                                                                                                                                                                                                                                                                                                                                                                                                                                                                                                                                                   |
| 12                                                        | Does the latrine have a cover for the squat hole                                 | 1 Yes<br>2 No                                                                                                                                                                                                                                                                                                                                                                                                                                                                                                                                                                                                                                                                                                                                                                                                                                     |
| 13                                                        | Is the cover/lid tight fitting?                                                  | 1 yes<br>2 No                                                                                                                                                                                                                                                                                                                                                                                                                                                                                                                                                                                                                                                                                                                                                                                                                                     |
| <b>C. Latrine cleanness and anal cleansing materials.</b> |                                                                                  |                                                                                                                                                                                                                                                                                                                                                                                                                                                                                                                                                                                                                                                                                                                                                                                                                                                   |
| 14                                                        | Latrine cleanness.                                                               | 1. Good = No sign of feaces and urine anywhere. Clean and tidy<br>2. Fair = Some feaces and urine around pan/squatting plate only<br>3. Poor = feaces and urine on floor, walls etc.                                                                                                                                                                                                                                                                                                                                                                                                                                                                                                                                                                                                                                                              |
| 15                                                        | Presence of anal cleansing materials                                             | 1. yes                      2. No                                                                                                                                                                                                                                                                                                                                                                                                                                                                                                                                                                                                                                                                                                                                                                                                                 |

| <b>D. Hand washing/ facility status</b>                      |                                                                                                                                                                                                                                                                                                                                                                                                                                                                                                                                |                                                                                                                                                    |
|--------------------------------------------------------------|--------------------------------------------------------------------------------------------------------------------------------------------------------------------------------------------------------------------------------------------------------------------------------------------------------------------------------------------------------------------------------------------------------------------------------------------------------------------------------------------------------------------------------|----------------------------------------------------------------------------------------------------------------------------------------------------|
| 16                                                           | Presence of a hand washing facility?                                                                                                                                                                                                                                                                                                                                                                                                                                                                                           | 1. Yes      2. No                                                                                                                                  |
| 17                                                           | What kind of hand washing facility does the latrine have?                                                                                                                                                                                                                                                                                                                                                                                                                                                                      | 1. Tap with piped water<br>2. Tippy tap<br>3. Jerrycan<br>4. Open bowel/basin<br>5. Others<br>specify.....                                         |
| 18                                                           | Presence of hand washing facility with only water?                                                                                                                                                                                                                                                                                                                                                                                                                                                                             | 1. Yes      2. No                                                                                                                                  |
| 19                                                           | If yes, is the water clean?                                                                                                                                                                                                                                                                                                                                                                                                                                                                                                    | 1. Yes      2. No                                                                                                                                  |
| 20                                                           | Presence of a hand washing facility with water soap/ash/or any other detergent?                                                                                                                                                                                                                                                                                                                                                                                                                                                | 1. Yes<br>2. No                                                                                                                                    |
| 21                                                           | Is there evidence that the hand washing facilities are used? (Wetness on ground below hand washing facility, worn track and other signs of recent use).                                                                                                                                                                                                                                                                                                                                                                        | 1. Yes<br>2. No                                                                                                                                    |
| <b>E. Open defecation (OD) status and presence of flies.</b> |                                                                                                                                                                                                                                                                                                                                                                                                                                                                                                                                |                                                                                                                                                    |
| 22                                                           | Are there flies observed in the latrine?                                                                                                                                                                                                                                                                                                                                                                                                                                                                                       | 1. Yes      2. No.                                                                                                                                 |
| 23                                                           | Is there any evidence of open defecation visible in or around the household?                                                                                                                                                                                                                                                                                                                                                                                                                                                   | 1. Yes<br>2. No                                                                                                                                    |
| <b>F. ODF status (outcome variable)</b>                      |                                                                                                                                                                                                                                                                                                                                                                                                                                                                                                                                |                                                                                                                                                    |
| 24                                                           | Observe the household and identify if it meets the following 4 CLTS standard/indicators or requirements for ODF status. <ul style="list-style-type: none"> <li>1. Presence of a latrine having a squat hole with a tight-fitting cover.</li> <li>2. Presence of hand washing facility with water and soap or ash or any other washing detergent</li> <li>3. No faeces seen around the vicinity/compound</li> <li>4. Evidence of use of (1) latrines and (2) hand washing facilities (see notes on evidence of use).</li> </ul> | 1. Meets all the 4 CLTS standards/indicators i.e. is predominantly ODF<br>2. Does not meet all the 4 standards/indicators i.e. is predominantly OD |

**Adapted from Plan International ODF Sustainability Study/ 2012.**

Tyndale-Biscoe P, Bond M, Kidd R, 2013. Plan International ODF Sustainability Study. Available at: [http://www.communityledtotalsanitation.org/sites/communityledtotalsanitation.org/files/Plan International ODF Sustainability Study.pdf](http://www.communityledtotalsanitation.org/sites/communityledtotalsanitation.org/files/Plan%20International%20ODF%20Sustainability%20Study.pdf). Accessed.

**Explanatory notes**

List of Materials: Wood | Bamboo | Masonry (concrete, brick) | Stone | Earth/Clay | Tin/Metal | Plastic | Ceramic | Thatch | Cloth/Sacking

**Notes on Evidence of Use:**

Latrines - look for fresh feaces in pit, recent flushing for pour flush latrines, and worn track to latrine from house

Hand washing - wetness on ground below hand washing facility, worn track and other signs of recent use.

Notes on Cleanliness of Latrine: Good = No sign of feaces and urine anywhere. Clean and tidy Fair = some feaces and urine around pan/squatting plate only

Poor = feaces and urine on the floor, walls etc.
